# Supplementary material for: Wearable Enzymatic Alcohol Biosensor
Source: Preprints.org preprint supplement (doi:10.20944/preprints201904.0103.v1), 2019-04-08
Supplement: Supplementary file 1 [file 20190328 Plateaus for Research Paper.xlsx]

## Sheet: Sheet1
Date	Conc	Peak Current
2019-03-26	6.25	50
2019-03-26	6.25	65
2019-03-26	6.25	70
2019-03-22	12.5	170
2019-03-22	12.5	180
2019-03-22	12.5	210
2019-03-28	25	280
2019-03-28	25	320
2019-03-28	25	330
2019-04-01	50	500
2019-04-01	50	630
2019-04-01	50	660
